# Supplementary material for: Versatile construction of van der Waals heterostructures using a dual-function polymeric film
Source: PubMed Central journal article supplement (PMC7295972; doi:10.1038/s41467-020-16817-1), 2020-06-15
Supplement: 41467_2020_16817_MOESM2_ESM.pdf [file 41467_2020_16817_MOESM2_ESM.pdf]

## **Description of Additional Supplementary Files**

File Name: Supplementary Movie 1

Description: The movie shows an example of our layer transfer process, in which a monolayer graphene residing on a PVA-coated substrate was picked up using a PPC/PDMS stamp.
